# Supplementary material for: Using theatre as an arts-based knowledge translation strategy for health-related information: a scoping review protocol
Source: PubMed Central journal article supplement — BMJ Open. 2019 Oct 30;9(10):e032738. doi: 10.1136/bmjopen-2019-032738 (PMC6830585; doi:10.1136/bmjopen-2019-032738), 2019-10-30
Supplement: bmjopen-2019-032738supp001.pdf [file bmjopen-2019-032738supp001.pdf]

**SUPPLEMENTARY FILE 1 - SEARCH STRING:**

(MH "Drama+" OR MH "Narrative Medicine+" OR TI theatre OR AB theatre OR TI theater OR AB theater OR TI playwriting or AB playwriting OR TI storytelling OR AB storytelling OR TI "interactive theatre" OR AB "interactive theatre" OR TI "interactive theater" OR AB "interactive theater") AND (MH Education OR SH education OR MH "Teaching Materials+" OR MH "Inservice Training+" OR MH "Staff Development+" OR MH "Health Plan Implementation+" OR MH "Quality Improvement+" OR TI workshop OR AB workshop OR TI seminar OR AB seminar OR TI training OR AB training OR TI implementation OR AB implementation OR MH "Health, Knowledge, Attitudes, Practice+" OR MH "Clinical Competence+" OR MH "Education, Continuing+" OR MH "Professional Competence+" OR MH "Guideline Adherence+" OR MH "Attitude of Health Personnel+" OR MH "Self Efficacy+" OR TI (knowledge N2 (uptake OR utilization OR utilisation OR transfer OR mobilisation OR mobilization OR implementation OR dissemination OR diffusion\* OR translation)) OR AB (knowledge N2 (uptake OR utilization OR utilisation OR transfer OR mobilisation OR mobilization OR implementation OR dissemination OR diffusion\* OR translation)) OR TI "Public Health" OR AB "Public Health" OR MH "Public Health+")

**SUPPLEMENTARY FILE 2 – EXAMPLE OF INCLUSION-EXCLUSION FORM THAT WILL BE ADAPTED FOR USE IN COVIDENCE**

| <b>Characteristic</b>                 | <b>Review Inclusion Criteria</b>                                                                                                                                                                                                                                                                                                                                                                                                                                | <b>Yes/ No</b> |
|---------------------------------------|-----------------------------------------------------------------------------------------------------------------------------------------------------------------------------------------------------------------------------------------------------------------------------------------------------------------------------------------------------------------------------------------------------------------------------------------------------------------|----------------|
| <b>Type of study</b>                  | <p>Included study types are:</p> <ul style="list-style-type: none"> <li>• Experimental (e.g. Randomised trial, non-randomised trial, Controlled before-after study, Interrupted time series)</li> <li>• Observational analytic or descriptive (e.g. cohort, cross sectional, case report)</li> <li>• Qualitative (focus groups, interview-based studies)</li> <li>• Methodological (e.g. description of how the KT strategy (theatre) was developed)</li> </ul> |                |
| <b>Participants (target audience)</b> | The target audience for the theatre can be any knowledge user of health research (e.g. patients, public, clinicians, policy makers, health system managers and researchers)                                                                                                                                                                                                                                                                                     |                |
| <b>Type of KT strategy</b>            | Intervention is a theatre-based drama.                                                                                                                                                                                                                                                                                                                                                                                                                          |                |
|                                       | Content is related to health information.                                                                                                                                                                                                                                                                                                                                                                                                                       |                |
|                                       | Health information is derived from published research or clinical guidelines. Opinion pieces are not eligible.                                                                                                                                                                                                                                                                                                                                                  |                |
|                                       | <p>Aim of the drama is to translate health-related research information for a knowledge user group.</p> <p>The goal could vary including and one of the following: to impart general awareness on a topic, to increase knowledge or skills, to change attitudes or behaviour.</p>                                                                                                                                                                               |                |
|                                       | Can be delivered in person or via a video recording of the drama.                                                                                                                                                                                                                                                                                                                                                                                               |                |
| <b>Types of outcome measures</b>      | <p>All outcomes that would be related to evaluation of the theatre as a KT strategy are eligible.</p> <p>For this scoping review we are also including descriptive studies only, thus, an evaluation and outcome measures are not necessary to be eligible for inclusion in this review.</p>                                                                                                                                                                    |                |

**SUPPLEMENTARY FILE 3 – SAMPLE OF DATA EXTRACTION ELEMENTS USED TO CREATE A DATA EXTRACTION FORM IN EXCEL**

| Category                          | Data elements                                     | Description                                                                                                                                             |
|-----------------------------------|---------------------------------------------------|---------------------------------------------------------------------------------------------------------------------------------------------------------|
| Article details                   | Authors                                           | Who are the listed authors?                                                                                                                             |
|                                   | Article type                                      | Is the article an empirical study, case study, commentary, brief report, etc.                                                                           |
|                                   | Year                                              | When was the article published?                                                                                                                         |
|                                   | Country                                           | What country did the article come from?                                                                                                                 |
| Study details                     | Rationale                                         | What was the stated rationale for the study?                                                                                                            |
|                                   | Aim                                               | What was the purpose of the study?                                                                                                                      |
| Health Knowledge to be translated | Health topic                                      | What health topic was the focus of the theatre-based KT?                                                                                                |
|                                   | Information source                                | How did they obtain the health information that was translated? Did they use existing guidelines? Generate new knowledge from surveys, or focus groups? |
|                                   | Translation of health knowledge into Key findings | What were the key research findings? Who was involved in the process of creating the key findings? Original researchers?                                |

|                                  |                               |                                                                                                                                                 |
|----------------------------------|-------------------------------|-------------------------------------------------------------------------------------------------------------------------------------------------|
|                                  | Information/content integrity | Was their credibility testing of the key messages with the researchers to ensure accuracy and integrity of the messages with research findings? |
| KT aim                           | Goal                          | What was the goal of the KT program? E.g. To increase awareness, to teach skills, to change practice.                                           |
| Intervention information         | Theatre type                  | What type of theatre was used?                                                                                                                  |
|                                  | Production development        | How was the theatre production developed?                                                                                                       |
|                                  | Enactment                     | How was it enacted? E.g. were audience members involved or passive participants?                                                                |
| Target knowledge user population | Audience                      | What was the target audience of the KT program?                                                                                                 |
| Evaluation                       | Study Design                  | How was the KT evaluated? What type of research design was used to evaluate the KT strategy?                                                    |
|                                  | Outcomes                      | What outcomes were assessed to evaluate the KT strategy? What outcome assessment tools were used?                                               |
|                                  | Data collection               | How did they collect study data and at what timepoints were data collected?                                                                     |
| Findings                         | Results                       | What was the summary of the findings or results of the study?                                                                                   |
